# Supplementary material
Source: ML conference proceedings conference paper supplement (https://openaccess.thecvf.com/content/CVPR_2019/html/Gao_Cross_Domain_Model_CVPR_2019_paper.html)
Supplement: Supplementary file 1 [file Gao_Cross_Domain_Model_CVPR_2019_supplemental.pdf]

# Appendix for: Cross Domain Model Compression by Structurally Weight Sharing

## A. Additional results for experiment

Table 1: Acceleration analysis on UCF-101

| Settings | Per mini-batch | Total     | Reduced % |
|----------|----------------|-----------|-----------|
| Standard | 2.80s          | 26min 30s | N/A       |
| $k_A$    | 1.23s          | 11min 42s | 56%       |
| $k_B$    | 1.16s          | 11min 2s  | 58.5%     |
| $k_C$    | 1.01s          | 9min 6s   | 63.9%     |

Table 2: Additional results on UCF-101

| Method                       | Performance   | Compression rate |
|------------------------------|---------------|------------------|
| Group Lasso[1]               | 81.2%         | 1.48             |
| GrOWL                        | 77.1 %        | 2.7              |
| <b>Ours <math>k_B</math></b> | <b>88.9 %</b> | <b>23</b>        |

2, Additional comparison results are given for UCF-101 dataset, we include GrOWL and Group Lasso[1] into comparison. In table 1, we present acceleration analysis for three different settings.

## References

- [1] W. Wen, C. Wu, Y. Wang, Y. Chen, and H. Li. Learning structured sparsity in deep neural networks. In *Advances in Neural Information Processing Systems*. 2016.

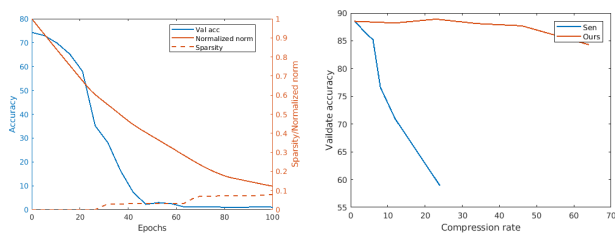

(a) Training process of GrOWL on UCF-101

(b) Compression rate and performance

Figure 1: (a) We present the validation accuracy, normalized weight norm, and sparsity of GrOWL during training. (b) We show the trade-off between performance and compression rate.

In appendix, we present additional experimental results. In Fig. 1, we present training progress of GrOWL and trade-off between compression rate and performance. In table
